# Supplementary material
Source: publisher site journal article supplement (https://www.dovepress.com/article/434080)
Supplement: Supplementary file 1 [file get_supplementary_file.php]

## Supplementary material 1

** = Key topic*

| Case | Topics |
| --- | --- |
| Case 1: Patient with infective chronic obstructive pulmonary disease. | Infective Chronic Obstructive Pulmonary Disease*  Acute Kidney Injury*  Oxygen therapy*  Arterial-Blood Gas* |
| Case 2: Patient with heart failure requiring oxygen therapy. | Acute Heart Failure*  Anaemia  Acute Coronary  Non-invasive Ventilation* |
| Case 3: Patient with atrial fibrillation and aspiration pneumonia. | Management of Atrial Fibrillation  Antiplatelets vs Anticoagulants  Management of Aspiration Pneumonia |
| Case 4: Patient with jaundice and ascites on a background of chronic alcohol excess. | Management of Alcohol Excess  Management of Variceal Bleeds  Lactic Acidosis*  Decompensated Chronic Liver Disease |
| Case 5: Patient experiencing delirium. | Delirium  Antibiotics*  Opioid Analgesia* |
| Case 6: Patient with a suspected PE. | Diabetic Ketoacidosis  Hyperosmolar Hyperglycaemic State |
| Management of interacting comorbidities* and considerations for elderly patients were topics which were integrated throughout most cases. | |

**Supplementary material 2**

**Pre-Course Survey**

*Please note: confidence scores were flipped in analysis (i.e. 1 = least; 6 = most confident)*

| **Question** | **Answer options** |
| --- | --- |
| **1. Demographics** |  |
| Email | FREE TEXT |
| How old are you? | NUMERICAL  Minimum 18 years old |
| What is your gender? | MULTIPLE CHOICE  · Male  · Female  · Non-binary  · Prefer not to say  · Prefer to self-identify [free text] |
| What is your race or ethnicity? | MULTIPLE CHOICE  · Asian/Asian British  a. Indian  b. Pakistani  c. Bangladeshi  d. Chinese  e. Other [free text]  · Black/African/Caribbean/Black British  a. African  b. Carribbean  c. Other [free text]  · White  a. English/Welsh/Scotish/Northern Irish/British  b. Irish  c. Other [free text]  · Mixed/Multiple ethnic groups  a. White and Black Carribbean  b. White and Black African  c. White and Asian  d. Any other Mixed/Multiple ethnic background [free text]  · Arab  · Other ethnic group [free text]  · Prefer not to say |
| Which medical school did you graduate from? | MULTIPLE CHOICE  All UK medical schools & prefer not to say |
| Are you an undergraduate or a graduate entry-medic? | BINARY  · Undergraduate Medicine  · Graduate Entry Medicine |
| Have you undertaken an additional degree? | MULTIPLE CHOICE  · Bachelor’s/Intercalated Bachelor’s  · Master’s/Intercalated Master’s  · PhD  · I do not have an additional degree |
| Are you based in the UK or not? | BINARY  · Yes  · No |
| Do you intend to practice in the UK in the future? | BINARY  · Yes  · No |
| What specialty do you intend to specialise in, or are interested in specialising in? | MULTIPLE CHOICE  · Allergy and immunology  · Anesthesiology  · Dermatology  · Diagnostic radiology  · Emergency medicine  · Neurology  · Nuclear medicine  · Obstetrics and gynecology  · Ophthalmology  · Pathology  · Paediatrics  · Physical medicine and rehabilitation  · Preventive medicine  · Psychiatry  · Radiation oncology  · Surgery  · Urology  · Undecided |
| **2. Clinical Preparedness, Confidence, and Knowledge** |  |
| Have you previously attended an online course/webinar in preparation for the foundation programme? | BINARY  · Yes  · No |
| Which resources have you used to prepare for foundation training? Select all that apply. | MULTIPLE CHOICE  · Websites  · Published Journal Articles  · Books  · Courses (not organised by the university)  · University (Lectures, Careers Team)  · University Societies (e.g. academic medicine society, surgical society)  · Friends and colleagues  · Nothing  · Other (free text) |
| Do you feel that your knowledge base is adequate to commence work as a foundation trainee? | LIKERT SCALE (1-6): (1) definitely yes, (2) probably yes, (3) somewhat yes, (4) not really, (5) probably not, (6) definitely not |
| Do you feel confident about starting foundation training? | LIKERT SCALE (1-6): (1) completely confident, (2) fairly confident, (3) somewhat confident, (4) slightly confident, (5) not very confident, (6) not at all confident |
| In a short sentence or phrase, please tell us what aspects of foundation training you feel most concerned or anxious about. | [FREE TEXT] |
| How would you rate your current overall confidence in managing the below acute medical presentations:  - Acute kidney injury  - Decompensated heart failure  - COPD  - Heart failure with reduced or preserved ejection fraction  - Lactate metabolism  - Acid-base balance  - Oxygen therapy  - Non-invasive ventilation  - Opioid prescribing  - Antibiotic prescribing  - Anticoagulant prescribing  - Management of interacting comorbidities | LIKERT SCALE (1-6) FOR EACH TOPIC: (1) completely confident, (2) fairly confident, (3) somewhat confident, (4) slightly confident, (5) not very confident, (6) not at all confident |
| **3. Perceptions of Online Learning** |  |
| Would you prefer a face-to-face course over an online course? | MULTIPLE CHOICE  · Yes  · No  · I don’t mind either |
| How easy has it been to find foundation training preparation resources during your time at medical school? | LIKERT SCALE (1-6): (1) extremely easy, (2) moderately easy, (3) slightly easy, (4) slightly difficult, (5) moderately difficult, (6) extremely difficult |
| In a short sentence or phrase, please tell us how COVID-19 has affected your confidence in beginning work as a foundation trainee. | FREE TEXT |
| In a short sentence or phrase, please tell us how COVID-19 has affected how prepared you feel to begin foundation training. | FREE TEXT |

Thank you for completing the pre-course survey. We look forward to seeing you at the course on Thursday 8th July!

**Post-Course Survey**

*Please note: confidence scores were flipped in analysis (i.e. 1 = least; 6 = most confident)*

| **Question** | **Answer options** |
| --- | --- |
| **1. Demographics** |  |
| Email | FREE TEXT |
| **2. Clinical Preparedness, Confidence, and Knowledge** |  |
| How knowledgeable do you feel in managing acute medical presentations as a foundation trainee having completed this course? | LIKERT SCALE (1-6): (1) definitely more knowledgeable than before, (2) probably more knowledgeable than before, (3) somewhat more knowledgeable than before, (4) no change, (5) probably less knowledgeable than before, (6) definitely less knowledgeable than before |
| How confident do you feel about managing acute medical presentations in foundation training having completed this course? | LIKERT SCALE (1-7): (1) definitely more confident than before, (2) probably more confident than before, (3) somewhat more confident than before, (4) no change, (5) somewhat less confident than before, (6) probably less confident than before, (7) definitely less confident than before |
| In a few words or phrases, please tell us how this course has changed your feelings of how knowledgeable you are in managing acute medical presentations, if at all. | FREE TEXT |
| In a few words or phrases, please tell us how this course has changed your confidence in managing acute medical presentations, if at all. | FREE TEXT |
| Having completed the course, how would you rate your current overall confidence in managing the below acute medical presentations:  - Acute kidney injury  - Decompensated heart failure  - COPD  - Heart failure with reduced or preserved ejection fraction  - Lactate metabolism  - Acid-base balance  - Oxygen therapy  - Non-invasive ventilation  - Opioid prescribing  - Antibiotic prescribing  - Anticoagulant prescribing  - Management of interacting comorbidities | LIKERT SCALE (1-6): (1) completely confident, (2) fairly confident, (3) somewhat confident, (4) slightly confident, (5) not very confident, (6) not at all confident |
| **3. Perceptions of Online Learning** |  |
| How would you rank the following statements on your experience of the course:  · a) It was stimulating and enjoyable.  · b) I found it easy to engage in the course.  · c) I felt able to ask questions I want.  · e) I felt that the online setting was as effective as a face-to-face setting.  · f) My internet connection was problematic.  · g) I found it difficult to raise questions and concerns in online courses.  · h) It was difficult to fully immerse myself in the course. | LIKERT SCALE (1-6): (1) completely agree, (2) strongly agree, (3) somewhat agree, (4) somewhat disagree, (5) strongly disagree, (6) completely disagree |
| In a few words/phrases, what did you find most useful about the course in helping you prepare for foundation training? | [FREE TEXT] |
| In a few words/phrases, please tell us what we could improve about the course to help you feel better prepared for foundation training? | [FREE TEXT] |
| Would you be willing to discuss your thoughts further via an online one-to-one interview? This will last no longer than ten minutes and you are free to withdraw your consent at any point by emailing the study lead at zcha154@ucl.ac.uk. | MULTIPLE CHOICE  ð Yes  ð No |

We thank you for your time spent taking this survey. Your response has been recorded.
